# Supplementary material for: Synergistic carbon and oxygen vacancy engineering on vanadium dioxide nanobelts for efficient aqueous zinc-ion batteries
Source: Royal Society of Chemistry journal article supplement (doi:10.1039/d3ma00622k), 2023-01-01
Supplement: d3ma00622k1.pdf [file d3ma00622k1.pdf]

## Supplementary Materials

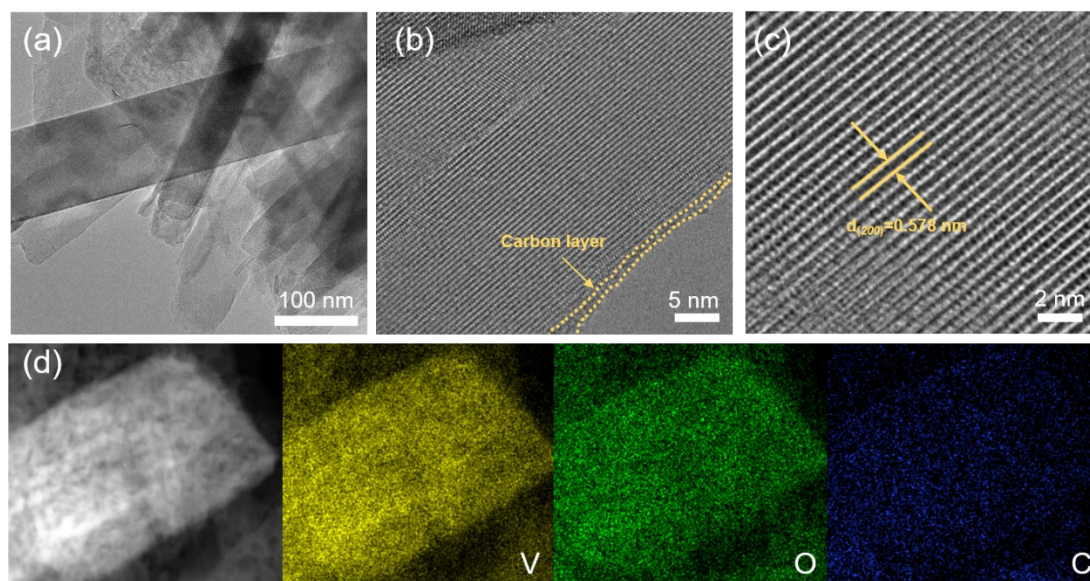

**Fig. S1.** (a) TEM image, (b, c) HRTEM images, and (d) EDS elemental mapping images of VO<sub>2</sub>@C-300.

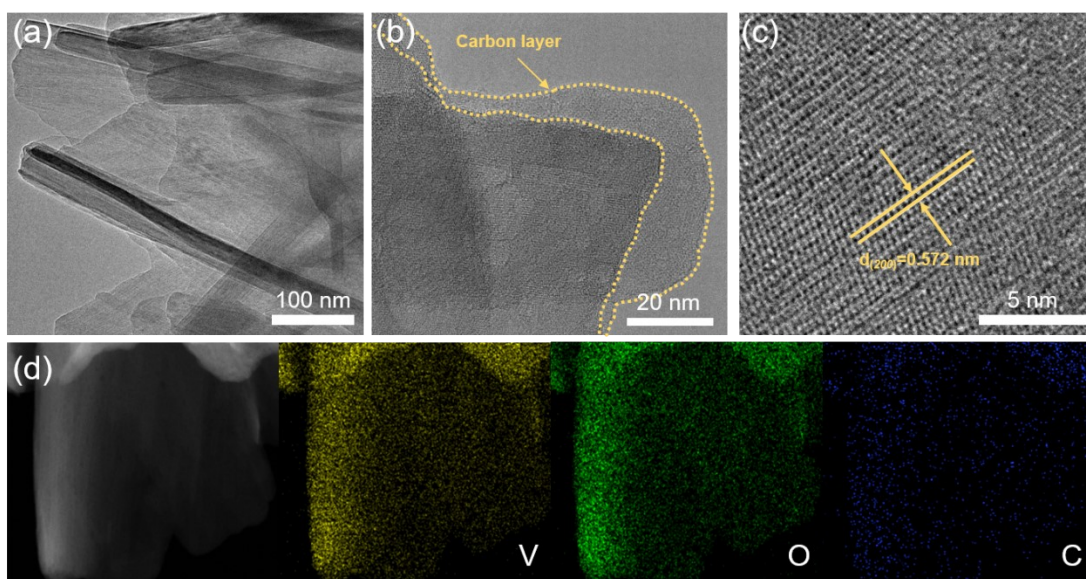

**Fig. S2.** (a, b) TEM images, (c) HRTEM image, and (d) EDS elemental mapping images of  $\text{VO}_2@\text{C-400}$ .

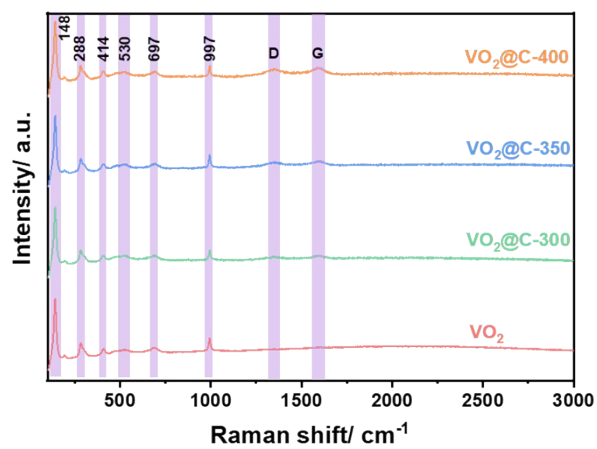

**Fig. S3.** Raman spectra of  $\text{VO}_2$ ,  $\text{VO}_2@\text{C-300}$ ,  $\text{VO}_2@\text{C-350}$ , and  $\text{VO}_2@\text{C-400}$ .

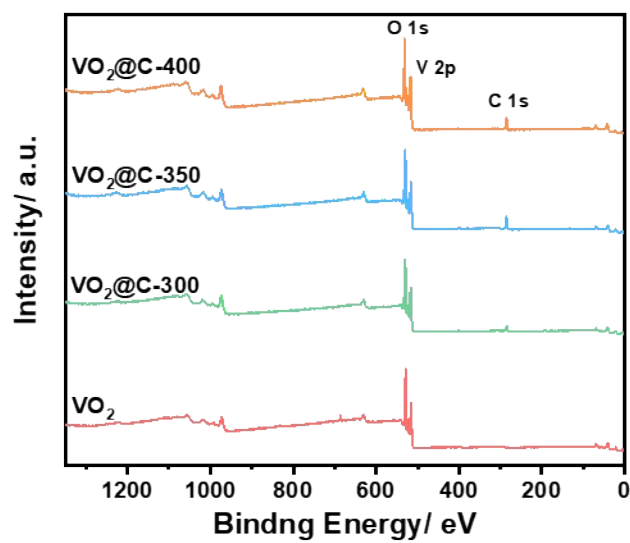

**Fig. S4.** Survey XPS spectra of VO<sub>2</sub>, VO<sub>2</sub>@C-300, VO<sub>2</sub>@C-350, and VO<sub>2</sub>@C-400.

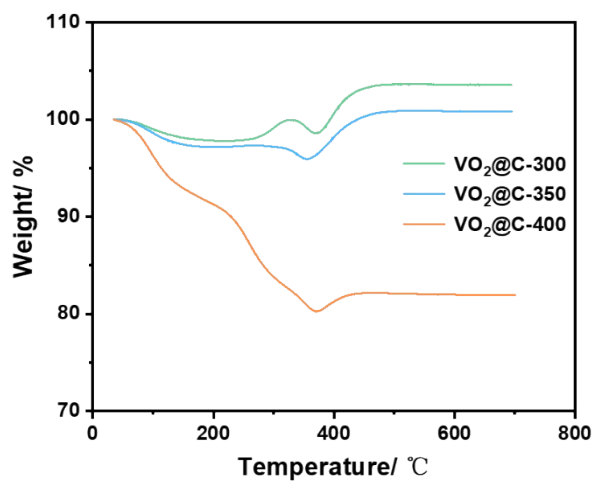

**Fig. S5.** TGA curves of VO<sub>2</sub>@C-300, VO<sub>2</sub>@C-350, and VO<sub>2</sub>@C-400 in the air.

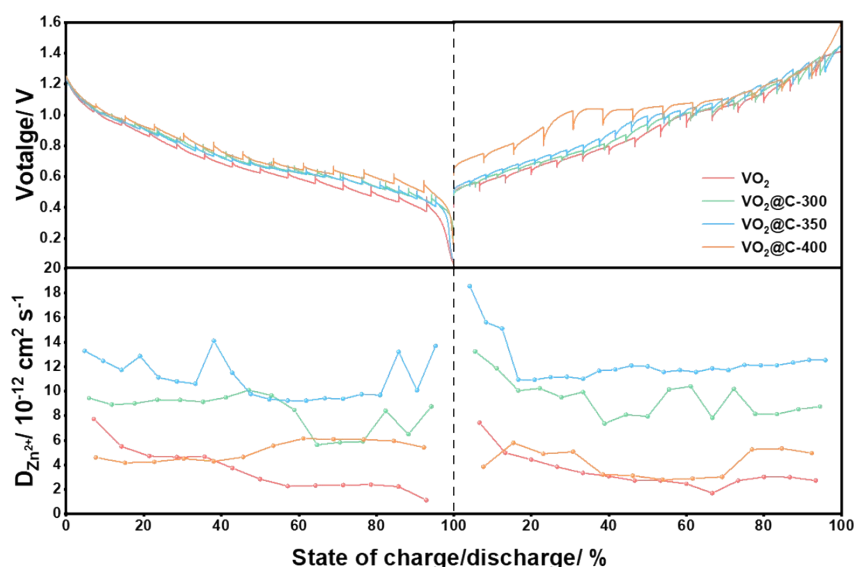

**Fig. S6.** (a) GITT curves for VO<sub>2</sub>, VO<sub>2</sub>@C-300, VO<sub>2</sub>@C-350, and VO<sub>2</sub>@C-400. (b, c) Zn<sup>2+</sup> diffusion coefficient curves with the corresponding discharge/charge states of VO<sub>2</sub>, VO<sub>2</sub>@C-300, VO<sub>2</sub>@C-350, and VO<sub>2</sub>@C-400.

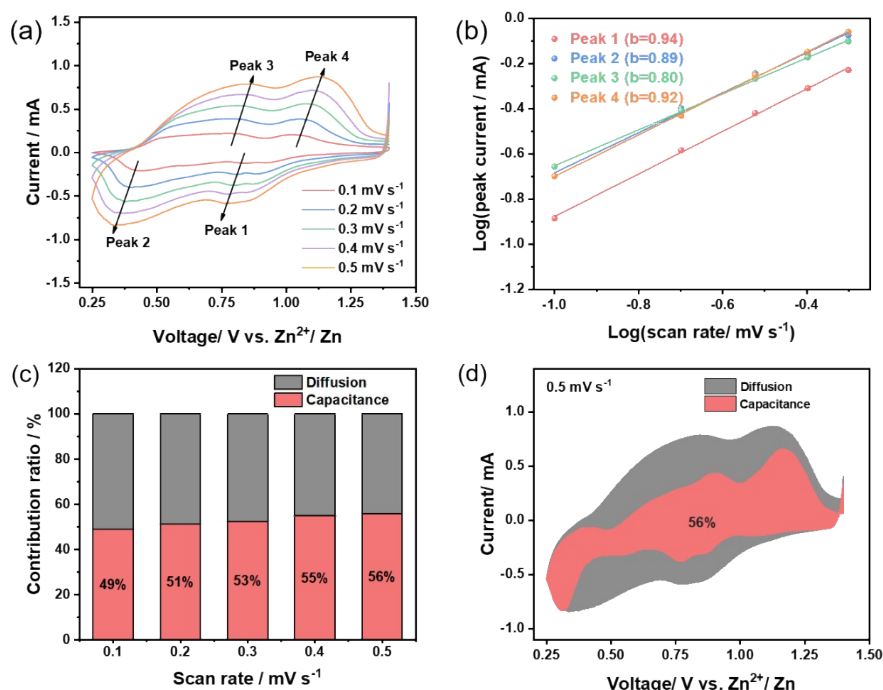

**Fig. S7.** Electrochemical kinetics investigation of pure VO<sub>2</sub>. (a) CV curves at various scan rates from 0.1 to 0.5 mV s<sup>-1</sup>. (b) Log(*i*) versus log(*v*) plots and *b* values for the slopes. (c) Capacitive contribution at various scan rates. (d) Capacitive contribution at 0.5 mV s<sup>-1</sup>.

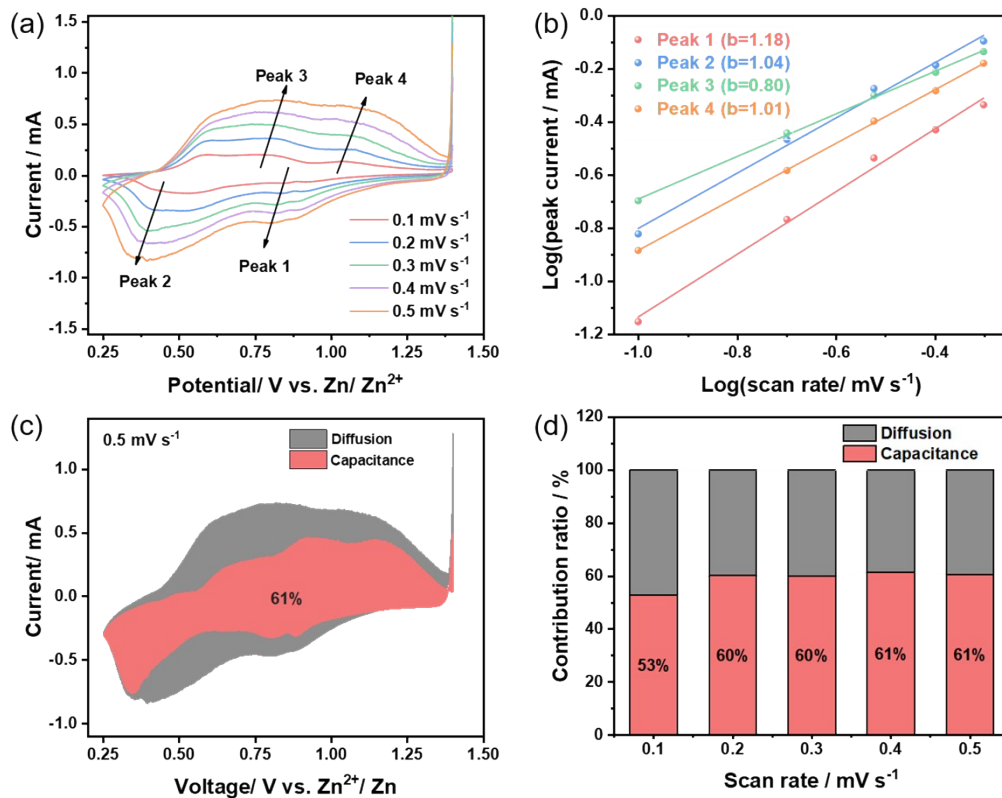

**Fig. S8.** Electrochemical kinetics investigation of VO<sub>2</sub>@C-300. (a) CV curves for VO<sub>2</sub>@C-300 at 0.1-0.5 mV s<sup>-1</sup>. (b) Log(*i*) versus log(*v*) plots of VO<sub>2</sub>@C-300. (c) Contribution of capacitive ion storage of VO<sub>2</sub>@C-300 at 0.1-0.5 mV s<sup>-1</sup>. (d) Contribution of capacitive ion storage of VO<sub>2</sub>@C-300 at 0.5 mV s<sup>-1</sup>.

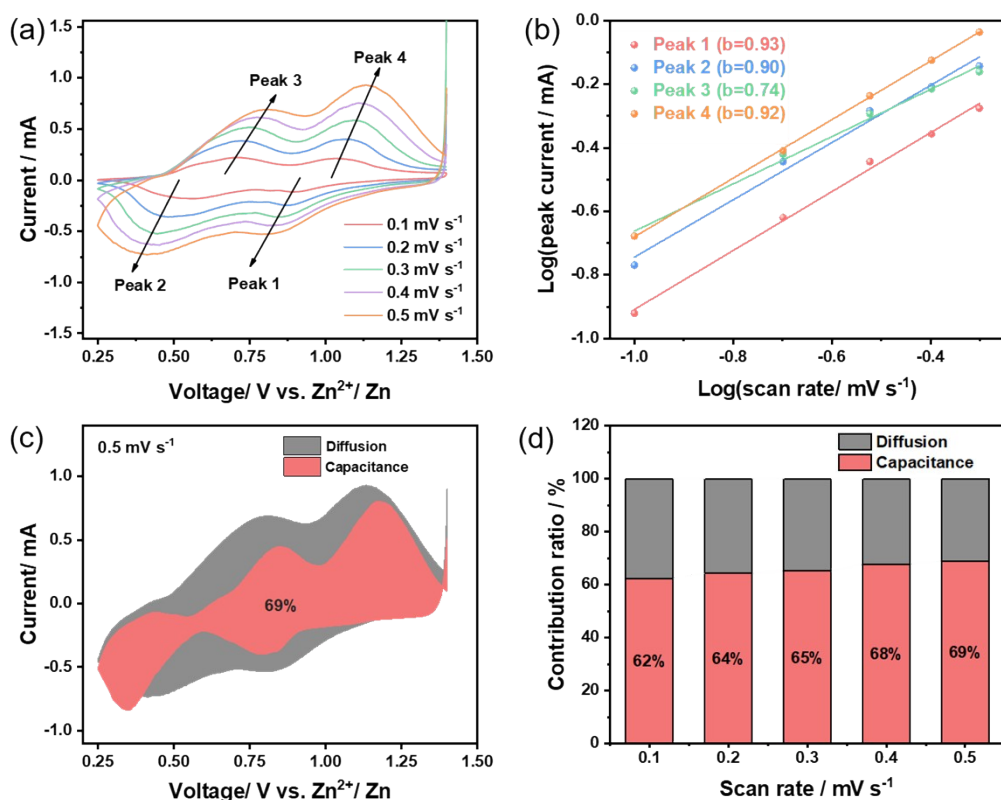

**Fig. S9.** Electrochemical kinetics investigation of VO<sub>2</sub>@C-400. (a) CV curves for VO<sub>2</sub>@C-400 at 0.1-0.5 mV s<sup>-1</sup>. (b) Log(*i*) versus log(*v*) plots of VO<sub>2</sub>@C-400. (c) Contribution of capacitive ion storage of VO<sub>2</sub>@C-400 at 0.1-0.5 mV s<sup>-1</sup>. (d) Contribution of capacitive ion storage of VO<sub>2</sub>@C-400 at 0.5 mV s<sup>-1</sup>.

**Table S1.** Fitting results of the EIS spectra for the AZIBs in Fig. 4a.

| Electrode              | $R_s / \Omega$ | $R_{ct} / \Omega$ | $\sigma / \Omega \text{ s}^{-1/2}$ | $D_{\text{Zn}}^{2+} / \text{cm}^2 \text{ s}^{-1}$ |
|------------------------|----------------|-------------------|------------------------------------|---------------------------------------------------|
| VO <sub>2</sub>        | 15.0           | 119.1             | 31.8                               | $9.7 \times 10^{-11}$                             |
| VO <sub>2</sub> @C-300 | 13.2           | 100.4             | 24.0                               | $1.7 \times 10^{-10}$                             |
| VO <sub>2</sub> @C-350 | 4.2            | 92.2              | 6.0                                | $2.7 \times 10^{-9}$                              |
| VO <sub>2</sub> @C-400 | 17.4           | 127.3             | 27.3                               | $1.3 \times 10^{-10}$                             |
